# Supplementary material for: MRI-based Nomogram to Preoperatively Predict Early Recurrence of Adenocarcinoma of the Esophagogastric Junction: a two-center study
Source: Research Square preprint supplement (doi:10.21203/rs.3.rs-6389616/v1), 2025-04-17
Supplement: Supplementary file 1 [file 4f297afcdff088fb206e4473.docx]

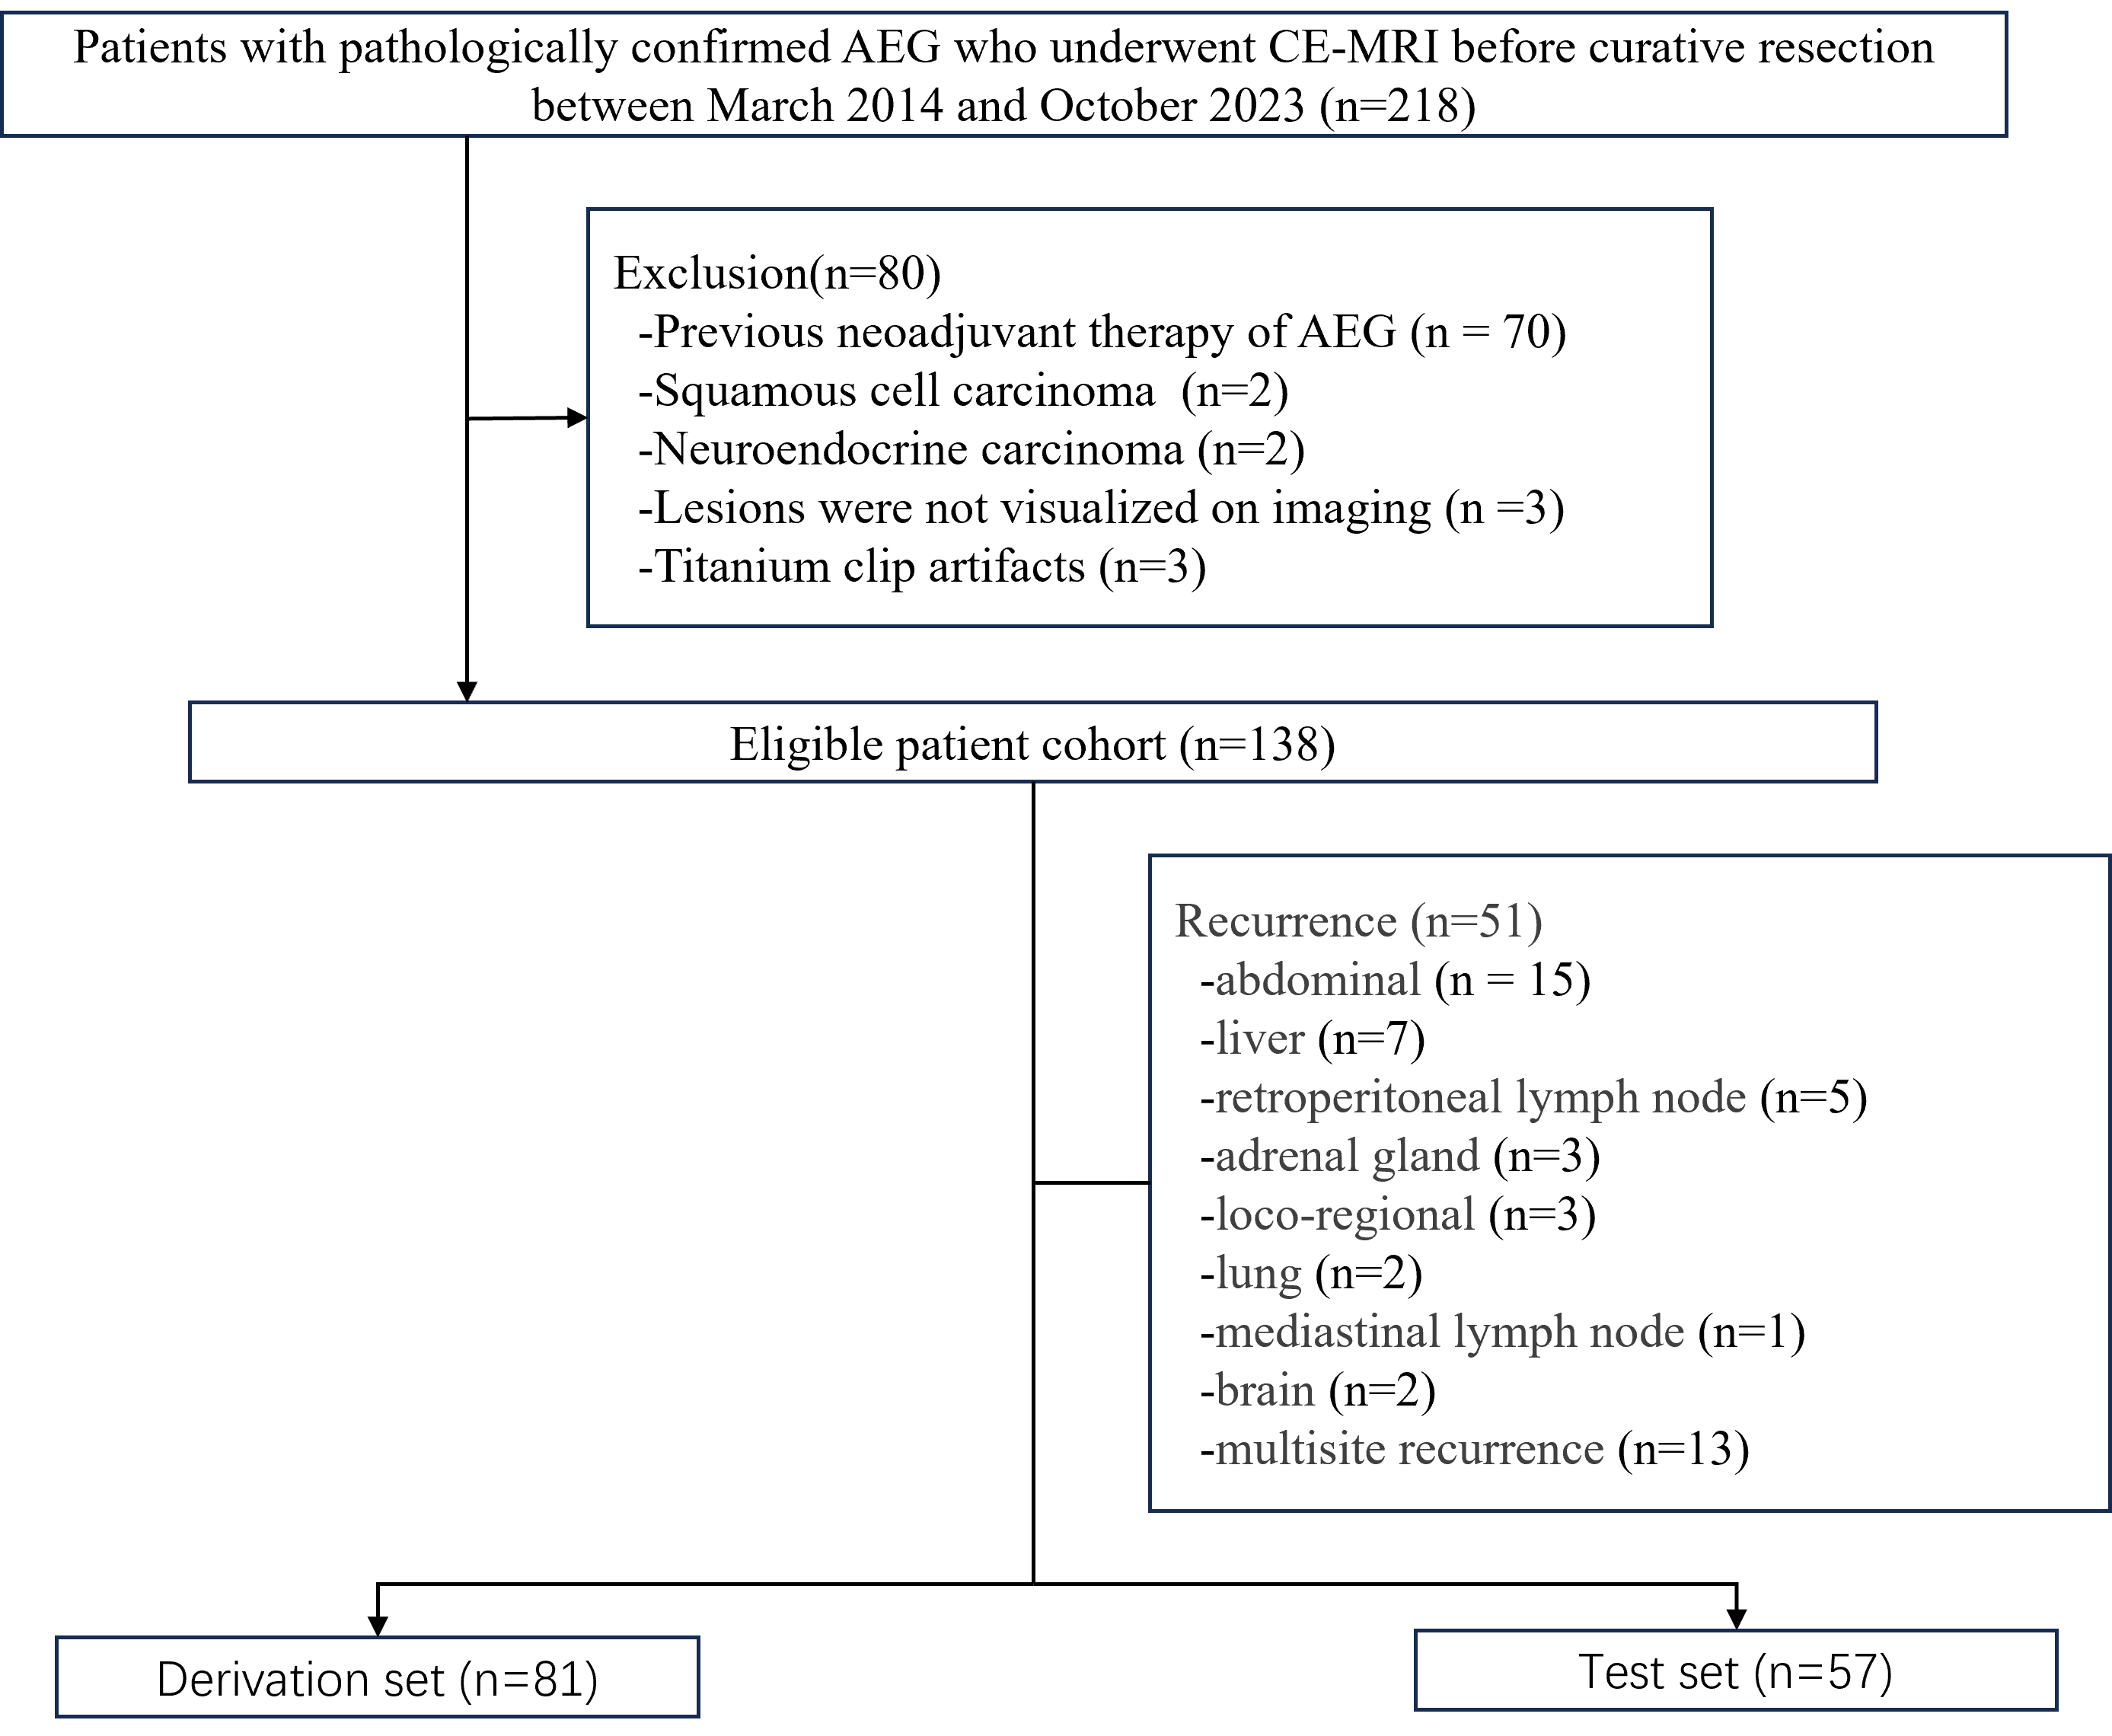


**Fig. S1** Flowchart of patient selection and recurrence patterns.

CE-MRI=Contrast–enhanced Magnetic Resonance Imaging
